# Supplementary material for: Estimation of Daily Reference Evapotranspiration from NASA POWER Reanalysis Products in a Hot Summer Mediterranean Climate
Source: MDPI journal article supplement (doi:10.3390/agronomy11102077), 2021-10-18
Supplement: s1 [file s1]

Table S1. Accuracy metrics relative to NASA POWER daily reference evapotranspiration without bias correction for all 14 locations.

| Location             | Method | b    | R <sup>2</sup> | RMSE<br>(mm d <sup>-1</sup> ) | NRMSE<br>(%) | MBE<br>(mm d <sup>-1</sup> ) | NMBE<br>(%) | EF   |
|----------------------|--------|------|----------------|-------------------------------|--------------|------------------------------|-------------|------|
| Aljustrel            | PM     | 1.12 | 0.88           | 0.93                          | 19.74        | 0.57                         | 12.17       | 0.69 |
|                      | HS_Rs  | 1.04 | 0.84           | 0.74                          | 15.66        | 0.29                         | 6.13        | 0.81 |
|                      | HS_S   | 0.97 | 0.81           | 0.74                          | 15.66        | -0.05                        | -1.15       | 0.81 |
|                      | HS_M   | 0.94 | 0.80           | 0.77                          | 16.46        | -0.21                        | -4.54       | 0.79 |
|                      | MaxTET | 0.97 | 0.77           | 0.80                          | 17.09        | 0.01                         | 0.19        | 0.77 |
| Alvalade             | PM     | 1.09 | 0.86           | 0.88                          | 18.27        | 0.44                         | 9.11        | 0.72 |
|                      | HS_Rs  | 1.02 | 0.85           | 0.68                          | 14.00        | 0.16                         | 3.37        | 0.83 |
|                      | HS_S   | 0.95 | 0.82           | 0.72                          | 14.96        | -0.18                        | -3.68       | 0.81 |
|                      | HS_M   | 0.94 | 0.82           | 0.75                          | 15.52        | -0.24                        | -5.06       | 0.80 |
|                      | MaxTET | 0.97 | 0.78           | 0.78                          | 16.09        | -0.02                        | -0.40       | 0.78 |
| Beja                 | PM     | 1.08 | 0.89           | 0.83                          | 16.60        | 0.36                         | 7.28        | 0.79 |
|                      | HS_Rs  | 0.98 | 0.88           | 0.65                          | 13.00        | -0.07                        | -1.46       | 0.87 |
|                      | HS_S   | 1.02 | 0.83           | 0.76                          | 15.27        | 0.18                         | 3.65        | 0.82 |
|                      | HS_M   | 1.02 | 0.83           | 0.76                          | 15.19        | 0.17                         | 3.50        | 0.82 |
|                      | MaxTET | 1.03 | 0.79           | 0.87                          | 17.41        | 0.30                         | 6.07        | 0.77 |
| Castro Verde         | PM     | 0.98 | 0.89           | 0.67                          | 12.53        | -0.08                        | -1.43       | 0.88 |
|                      | HS_Rs  | 0.91 | 0.87           | 0.85                          | 15.86        | -0.38                        | -7.09       | 0.81 |
|                      | HS_S   | 0.91 | 0.84           | 0.91                          | 16.94        | -0.38                        | -7.14       | 0.79 |
|                      | HS_M   | 0.93 | 0.84           | 0.84                          | 15.69        | -0.25                        | -4.75       | 0.82 |
|                      | MaxTET | 0.97 | 0.80           | 0.90                          | 16.74        | 0.02                         | 0.44        | 0.79 |
| Elvas                | PM     | 1.08 | 0.88           | 0.88                          | 17.95        | 0.38                         | 7.86        | 0.76 |
|                      | HS_Rs  | 0.99 | 0.86           | 0.68                          | 14.01        | -0.01                        | -0.20       | 0.85 |
|                      | HS_S   | 0.96 | 0.82           | 0.77                          | 15.71        | -0.12                        | -2.46       | 0.81 |
|                      | HS_M   | 0.93 | 0.81           | 0.82                          | 16.80        | -0.28                        | -5.77       | 0.79 |
|                      | MaxTET | 0.96 | 0.77           | 0.85                          | 17.50        | -0.09                        | -1.81       | 0.77 |
| Estremoz             | PM     | 1.26 | 0.83           | 1.41                          | 33.81        | 1.08                         | 26.01       | 0.13 |
|                      | HS_Rs  | 1.16 | 0.87           | 0.96                          | 23.14        | 0.73                         | 17.56       | 0.59 |
|                      | HS_S   | 0.98 | 0.81           | 0.66                          | 15.74        | 0.02                         | 0.45        | 0.81 |
|                      | HS_M   | 1.02 | 0.81           | 0.68                          | 16.32        | 0.17                         | 4.20        | 0.80 |
|                      | MaxTET | 1.04 | 0.77           | 0.78                          | 18.71        | 0.30                         | 7.14        | 0.73 |
| Évora                | PM     | 1.15 | 0.87           | 1.03                          | 22.73        | 0.66                         | 14.59       | 0.61 |
|                      | HS_Rs  | 1.06 | 0.87           | 0.72                          | 15.89        | 0.31                         | 6.88        | 0.81 |
|                      | HS_S   | 0.96 | 0.80           | 0.73                          | 16.24        | -0.08                        | -1.80       | 0.80 |
|                      | HS_M   | 0.96 | 0.80           | 0.74                          | 16.42        | -0.11                        | -2.48       | 0.80 |
|                      | MaxTET | 1.01 | 0.76           | 0.83                          | 18.37        | 0.16                         | 3.59        | 0.74 |
| Ferreira do Alentejo | PM     | 1.15 | 0.88           | 1.01                          | 22.41        | 0.67                         | 14.77       | 0.58 |
|                      | HS_Rs  | 1.07 | 0.86           | 0.72                          | 16.01        | 0.35                         | 7.68        | 0.79 |
|                      | HS_S   | 0.96 | 0.81           | 0.70                          | 15.41        | -0.10                        | -2.20       | 0.80 |
|                      | HS_M   | 0.96 | 0.81           | 0.70                          | 15.63        | -0.13                        | -2.87       | 0.80 |
|                      | MaxTET | 0.97 | 0.77           | 0.76                          | 16.78        | -0.01                        | -0.18       | 0.77 |

|                          |               |      |      |      |       |       |       |       |
|--------------------------|---------------|------|------|------|-------|-------|-------|-------|
| <b>Moura</b>             | <b>PM</b>     | 1.22 | 0.88 | 1.30 | 29.40 | 0.96  | 21.61 | 0.30  |
|                          | <b>HS_Rs</b>  | 1.11 | 0.85 | 0.88 | 19.83 | 0.51  | 11.56 | 0.68  |
|                          | <b>HS_S</b>   | 0.95 | 0.82 | 0.68 | 15.35 | -0.17 | -3.87 | 0.81  |
|                          | <b>HS_M</b>   | 0.92 | 0.81 | 0.74 | 16.68 | -0.30 | -6.75 | 0.77  |
|                          | <b>MaxTET</b> | 0.96 | 0.79 | 0.71 | 16.16 | -0.06 | -1.37 | 0.79  |
| <b>Odemira</b>           | <b>PM</b>     | 1.24 | 0.71 | 1.27 | 33.43 | 0.91  | 23.95 | -0.32 |
|                          | <b>HS_Rs</b>  | 1.27 | 0.70 | 1.34 | 35.19 | 1.06  | 27.81 | -0.46 |
|                          | <b>HS_S</b>   | 1.07 | 0.63 | 0.84 | 22.02 | 0.30  | 7.86  | 0.43  |
|                          | <b>HS_M</b>   | 1.03 | 0.64 | 0.74 | 19.54 | 0.17  | 4.50  | 0.55  |
|                          | <b>MaxTET</b> | 1.06 | 0.60 | 0.79 | 20.90 | 0.35  | 9.26  | 0.48  |
| <b>Redondo</b>           | <b>PM</b>     | 1.03 | 0.89 | 0.71 | 14.04 | 0.13  | 2.66  | 0.86  |
|                          | <b>HS_Rs</b>  | 0.95 | 0.86 | 0.75 | 14.76 | -0.23 | -4.47 | 0.84  |
|                          | <b>HS_S</b>   | 0.97 | 0.79 | 0.85 | 16.80 | -0.02 | -0.33 | 0.79  |
|                          | <b>HS_M</b>   | 0.96 | 0.80 | 0.86 | 16.91 | -0.09 | -1.86 | 0.79  |
|                          | <b>MaxTET</b> | 0.98 | 0.76 | 0.92 | 18.24 | 0.08  | 1.60  | 0.76  |
| <b>Serpa</b>             | <b>PM</b>     | 1.19 | 0.85 | 1.25 | 27.06 | 0.87  | 18.89 | 0.42  |
|                          | <b>HS_Rs</b>  | 1.08 | 0.88 | 0.74 | 15.89 | 0.43  | 9.21  | 0.80  |
|                          | <b>HS_S</b>   | 0.97 | 0.81 | 0.72 | 15.52 | -0.03 | -0.66 | 0.81  |
|                          | <b>HS_M</b>   | 0.97 | 0.81 | 0.72 | 15.52 | -0.03 | -0.66 | 0.81  |
|                          | <b>MaxTET</b> | 0.99 | 0.77 | 0.80 | 17.20 | 0.07  | 1.52  | 0.77  |
| <b>Viana do Alentejo</b> | <b>PM</b>     | 1.10 | 0.88 | 0.85 | 18.15 | 0.50  | 10.65 | 0.76  |
|                          | <b>HS_Rs</b>  | 1.02 | 0.84 | 0.71 | 15.08 | 0.18  | 3.74  | 0.83  |
|                          | <b>HS_S</b>   | 0.98 | 0.78 | 0.81 | 17.28 | 0.02  | 0.50  | 0.78  |
|                          | <b>HS_M</b>   | 0.96 | 0.80 | 0.79 | 16.82 | -0.06 | -1.18 | 0.79  |
|                          | <b>MaxTET</b> | 1.00 | 0.75 | 0.90 | 19.07 | 0.19  | 4.01  | 0.73  |
| <b>Vidigueira</b>        | <b>PM</b>     | 1.13 | 0.87 | 1.02 | 21.41 | 0.63  | 13.22 | 0.64  |
|                          | <b>HS_Rs</b>  | 1.04 | 0.89 | 0.61 | 12.89 | 0.21  | 4.38  | 0.87  |
|                          | <b>HS_S</b>   | 0.94 | 0.80 | 0.77 | 16.25 | -0.18 | -3.75 | 0.79  |
|                          | <b>HS_M</b>   | 0.95 | 0.80 | 0.77 | 16.15 | -0.15 | -3.09 | 0.80  |
|                          | <b>MaxTET</b> | 0.98 | 0.75 | 0.84 | 17.68 | 0.02  | 0.40  | 0.75  |

Table S2. Accuracy metrics relative to NASA POWER daily reference evapotranspiration with regional bias correction for all 14 locations.

| Location             | Method | b    | R <sup>2</sup> | RMSE<br>(mm d <sup>-1</sup> ) | NRMSE<br>(%) | MBE<br>(mm d <sup>-1</sup> ) | NMBE<br>(%) | EF   |
|----------------------|--------|------|----------------|-------------------------------|--------------|------------------------------|-------------|------|
| Aljustrel            | PM     | 0.95 | 0.88           | 0.63                          | 13.38        | -0.21                        | -4.47       | 0.86 |
|                      | HS_Rs  | 1.00 | 0.84           | 0.69                          | 14.57        | 0.08                         | 1.78        | 0.83 |
|                      | HS_S   | 1.01 | 0.80           | 0.76                          | 16.19        | 0.17                         | 3.68        | 0.79 |
|                      | HS_M   | 0.98 | 0.80           | 0.75                          | 15.93        | 0.00                         | 0.11        | 0.80 |
|                      | MaxTET | 0.99 | 0.77           | 0.81                          | 17.25        | 0.09                         | 1.84        | 0.77 |
| Alvalade             | PM     | 0.93 | 0.87           | 0.71                          | 14.59        | -0.34                        | -7.09       | 0.82 |
|                      | HS_Rs  | 0.98 | 0.84           | 0.66                          | 13.65        | -0.04                        | -0.87       | 0.84 |
|                      | HS_S   | 0.99 | 0.82           | 0.71                          | 14.70        | 0.05                         | 1.03        | 0.82 |
|                      | HS_M   | 0.98 | 0.81           | 0.72                          | 14.87        | -0.02                        | -0.44       | 0.81 |
|                      | MaxTET | 0.99 | 0.78           | 0.78                          | 16.19        | 0.06                         | 1.24        | 0.78 |
| Beja                 | PM     | 0.90 | 0.89           | 0.77                          | 15.40        | -0.49                        | -9.87       | 0.82 |
|                      | HS_Rs  | 0.94 | 0.87           | 0.70                          | 13.99        | -0.28                        | -5.60       | 0.85 |
|                      | HS_S   | 1.06 | 0.83           | 0.85                          | 17.13        | 0.41                         | 8.20        | 0.77 |
|                      | HS_M   | 1.05 | 0.83           | 0.85                          | 16.98        | 0.40                         | 8.03        | 0.78 |
|                      | MaxTET | 1.04 | 0.79           | 0.90                          | 18.05        | 0.38                         | 7.65        | 0.75 |
| Castro Verde         | PM     | 0.83 | 0.88           | 1.12                          | 20.92        | -0.86                        | -16.05      | 0.68 |
|                      | HS_Rs  | 0.87 | 0.87           | 0.98                          | 18.30        | -0.58                        | -10.91      | 0.75 |
|                      | HS_S   | 0.94 | 0.83           | 0.86                          | 16.00        | -0.14                        | -2.64       | 0.81 |
|                      | HS_M   | 0.97 | 0.83           | 0.82                          | 15.26        | -0.01                        | -0.16       | 0.83 |
|                      | MaxTET | 0.98 | 0.80           | 0.91                          | 17.04        | 0.11                         | 2.08        | 0.79 |
| Elvas                | PM     | 0.91 | 0.90           | 0.73                          | 15.07        | -0.47                        | -9.68       | 0.83 |
|                      | HS_Rs  | 0.95 | 0.86           | 0.71                          | 14.46        | -0.22                        | -4.42       | 0.84 |
|                      | HS_S   | 1.00 | 0.82           | 0.77                          | 15.80        | 0.09                         | 1.89        | 0.81 |
|                      | HS_M   | 0.96 | 0.81           | 0.78                          | 15.98        | -0.08                        | -1.60       | 0.81 |
|                      | MaxTET | 0.97 | 0.77           | 0.85                          | 17.38        | -0.02                        | -0.32       | 0.77 |
| Estremoz             | PM     | 1.06 | 0.87           | 0.68                          | 16.33        | 0.28                         | 6.64        | 0.80 |
|                      | HS_Rs  | 1.12 | 0.87           | 0.80                          | 19.14        | 0.53                         | 12.69       | 0.72 |
|                      | HS_S   | 1.02 | 0.81           | 0.69                          | 16.63        | 0.21                         | 4.93        | 0.79 |
|                      | HS_M   | 1.06 | 0.81           | 0.76                          | 18.25        | 0.37                         | 8.87        | 0.75 |
|                      | MaxTET | 1.05 | 0.77           | 0.81                          | 19.43        | 0.37                         | 8.86        | 0.71 |
| Évora                | PM     | 0.97 | 0.89           | 0.58                          | 12.91        | -0.14                        | -3.20       | 0.87 |
|                      | HS_Rs  | 1.02 | 0.87           | 0.64                          | 14.12        | 0.11                         | 2.45        | 0.85 |
|                      | HS_S   | 1.00 | 0.80           | 0.75                          | 16.58        | 0.12                         | 2.63        | 0.79 |
|                      | HS_M   | 0.99 | 0.80           | 0.75                          | 16.57        | 0.09                         | 1.90        | 0.79 |
|                      | MaxTET | 1.02 | 0.76           | 0.85                          | 18.73        | 0.24                         | 5.26        | 0.73 |
| Ferreira do Alentejo | PM     | 0.98 | 0.89           | 0.56                          | 12.33        | -0.12                        | -2.62       | 0.87 |
|                      | HS_Rs  | 1.02 | 0.86           | 0.63                          | 14.06        | 0.14                         | 3.20        | 0.84 |
|                      | HS_S   | 1.00 | 0.80           | 0.70                          | 15.60        | 0.11                         | 2.42        | 0.80 |
|                      | HS_M   | 1.00 | 0.80           | 0.70                          | 15.60        | 0.08                         | 1.70        | 0.80 |
|                      | MaxTET | 0.98 | 0.77           | 0.76                          | 16.91        | 0.07                         | 1.46        | 0.76 |

|                          |               |      |      |      |       |       |        |       |
|--------------------------|---------------|------|------|------|-------|-------|--------|-------|
| <b>Moura</b>             | <b>PM</b>     | 1.02 | 0.90 | 0.58 | 13.13 | 0.07  | 1.52   | 0.86  |
|                          | <b>HS_Rs</b>  | 1.07 | 0.85 | 0.74 | 16.84 | 0.30  | 6.86   | 0.77  |
|                          | <b>HS_S</b>   | 0.98 | 0.82 | 0.66 | 14.91 | 0.02  | 0.38   | 0.82  |
|                          | <b>HS_M</b>   | 0.96 | 0.81 | 0.68 | 15.48 | -0.12 | -2.63  | 0.80  |
|                          | <b>MaxTET</b> | 0.97 | 0.79 | 0.71 | 16.08 | 0.00  | 0.09   | 0.79  |
| <b>Odemira</b>           | <b>PM</b>     | 1.08 | 0.71 | 0.80 | 21.10 | 0.33  | 8.80   | 0.47  |
|                          | <b>HS_Rs</b>  | 1.22 | 0.70 | 1.17 | 30.76 | 0.86  | 22.64  | -0.12 |
|                          | <b>HS_S</b>   | 1.14 | 0.63 | 1.00 | 26.19 | 0.62  | 16.38  | 0.19  |
|                          | <b>HS_M</b>   | 1.11 | 0.64 | 0.86 | 22.72 | 0.49  | 12.80  | 0.39  |
|                          | <b>MaxTET</b> | 1.09 | 0.61 | 0.84 | 22.03 | 0.45  | 11.77  | 0.43  |
| <b>Redondo</b>           | <b>PM</b>     | 0.87 | 0.90 | 0.90 | 17.83 | -0.68 | -13.34 | 0.77  |
|                          | <b>HS_Rs</b>  | 0.91 | 0.86 | 0.83 | 16.43 | -0.43 | -8.44  | 0.80  |
|                          | <b>HS_S</b>   | 1.01 | 0.79 | 0.89 | 17.53 | 0.21  | 4.15   | 0.78  |
|                          | <b>HS_M</b>   | 0.99 | 0.79 | 0.87 | 17.13 | 0.13  | 2.55   | 0.79  |
|                          | <b>MaxTET</b> | 1.00 | 0.76 | 0.94 | 18.50 | 0.16  | 3.23   | 0.75  |
| <b>Serpa</b>             | <b>PM</b>     | 1.00 | 0.88 | 0.61 | 13.23 | -0.01 | -0.18  | 0.86  |
|                          | <b>HS_Rs</b>  | 1.03 | 0.88 | 0.62 | 13.42 | 0.22  | 4.65   | 0.86  |
|                          | <b>HS_S</b>   | 1.01 | 0.81 | 0.74 | 16.02 | 0.17  | 3.65   | 0.80  |
|                          | <b>HS_M</b>   | 1.01 | 0.81 | 0.74 | 16.02 | 0.17  | 3.65   | 0.80  |
|                          | <b>MaxTET</b> | 1.00 | 0.77 | 0.80 | 17.35 | 0.14  | 2.96   | 0.76  |
| <b>Viana do Alentejo</b> | <b>PM</b>     | 0.93 | 0.87 | 0.69 | 14.75 | -0.29 | -6.12  | 0.84  |
|                          | <b>HS_Rs</b>  | 0.98 | 0.84 | 0.69 | 14.69 | -0.03 | -0.57  | 0.84  |
|                          | <b>HS_S</b>   | 1.02 | 0.77 | 0.87 | 18.45 | 0.24  | 5.21   | 0.75  |
|                          | <b>HS_M</b>   | 1.00 | 0.79 | 0.82 | 17.41 | 0.16  | 3.45   | 0.78  |
|                          | <b>MaxTET</b> | 1.01 | 0.75 | 0.92 | 19.61 | 0.27  | 5.68   | 0.72  |
| <b>Vidigueira</b>        | <b>PM</b>     | 0.95 | 0.89 | 0.61 | 12.88 | -0.23 | -4.93  | 0.87  |
|                          | <b>HS_Rs</b>  | 0.99 | 0.89 | 0.56 | 11.78 | 0.00  | 0.01   | 0.89  |
|                          | <b>HS_S</b>   | 0.98 | 0.80 | 0.76 | 16.03 | 0.02  | 0.43   | 0.80  |
|                          | <b>HS_M</b>   | 0.98 | 0.80 | 0.77 | 16.16 | 0.05  | 1.14   | 0.80  |
|                          | <b>MaxTET</b> | 0.99 | 0.75 | 0.84 | 17.79 | 0.09  | 1.89   | 0.75  |

Table S3. Accuracy metrics relative to NASA POWER daily reference evapotranspiration with local bias correction for all 14 locations.

| Location             | Method | b    | R <sup>2</sup> | RMSE<br>(mm d <sup>-1</sup> ) | NRMSE<br>(%) | MBE<br>(mm d <sup>-1</sup> ) | NMBE<br>(%) | EF   |
|----------------------|--------|------|----------------|-------------------------------|--------------|------------------------------|-------------|------|
| Aljustrel            | PM     | 0.91 | 0.88           | 0.72                          | 15.24        | -0.41                        | -8.64       | 0.82 |
|                      | HS_Rs  | 0.95 | 0.83           | 0.70                          | 14.78        | -0.14                        | -2.89       | 0.83 |
|                      | HS_S   | 1.03 | 0.80           | 0.79                          | 16.79        | 0.27                         | 5.65        | 0.78 |
|                      | HS_M   | 1.00 | 0.80           | 0.76                          | 16.07        | 0.09                         | 2.00        | 0.80 |
|                      | MaxTET | 1.00 | 0.77           | 0.82                          | 17.47        | 0.16                         | 3.33        | 0.76 |
| Alvalade             | PM     | 0.92 | 0.88           | 0.71                          | 14.68        | -0.39                        | -8.15       | 0.82 |
|                      | HS_Rs  | 0.97 | 0.84           | 0.67                          | 13.85        | -0.07                        | -1.36       | 0.84 |
|                      | HS_S   | 1.01 | 0.82           | 0.73                          | 15.02        | 0.14                         | 2.99        | 0.81 |
|                      | HS_M   | 1.00 | 0.81           | 0.73                          | 15.00        | 0.07                         | 1.49        | 0.81 |
|                      | MaxTET | 1.00 | 0.78           | 0.80                          | 16.52        | 0.16                         | 3.30        | 0.77 |
| Beja                 | PM     | 0.95 | 0.91           | 0.61                          | 12.32        | -0.26                        | -5.26       | 0.88 |
|                      | HS_Rs  | 1.01 | 0.87           | 0.66                          | 13.22        | 0.08                         | 1.51        | 0.87 |
|                      | HS_S   | 1.02 | 0.83           | 0.78                          | 15.60        | 0.22                         | 4.50        | 0.81 |
|                      | HS_M   | 1.02 | 0.83           | 0.77                          | 15.51        | 0.22                         | 4.35        | 0.81 |
|                      | MaxTET | 1.02 | 0.79           | 0.86                          | 17.19        | 0.26                         | 5.25        | 0.77 |
| Castro Verde         | PM     | 0.92 | 0.90           | 0.77                          | 14.32        | -0.44                        | -8.15       | 0.85 |
|                      | HS_Rs  | 0.89 | 0.87           | 0.89                          | 16.57        | -0.46                        | -8.59       | 0.80 |
|                      | HS_S   | 0.96 | 0.83           | 0.83                          | 15.56        | -0.08                        | -1.59       | 0.82 |
|                      | HS_M   | 0.98 | 0.83           | 0.81                          | 15.13        | 0.05                         | 0.94        | 0.83 |
|                      | MaxTET | 0.99 | 0.80           | 0.91                          | 16.95        | 0.15                         | 2.80        | 0.79 |
| Elvas                | PM     | 0.95 | 0.90           | 0.64                          | 13.02        | -0.27                        | -5.64       | 0.87 |
|                      | HS_Rs  | 0.97 | 0.86           | 0.68                          | 14.02        | -0.11                        | -2.35       | 0.85 |
|                      | HS_S   | 1.02 | 0.81           | 0.80                          | 16.46        | 0.24                         | 4.83        | 0.80 |
|                      | HS_M   | 0.99 | 0.81           | 0.78                          | 15.98        | 0.06                         | 1.24        | 0.81 |
|                      | MaxTET | 0.99 | 0.77           | 0.85                          | 17.50        | 0.11                         | 2.22        | 0.77 |
| Estremoz             | PM     | 0.97 | 0.88           | 0.55                          | 13.14        | -0.12                        | -2.98       | 0.87 |
|                      | HS_Rs  | 1.11 | 0.88           | 0.76                          | 18.36        | 0.46                         | 11.16       | 0.74 |
|                      | HS_S   | 0.96 | 0.81           | 0.66                          | 15.97        | -0.07                        | -1.59       | 0.81 |
|                      | HS_M   | 1.00 | 0.81           | 0.67                          | 16.00        | 0.09                         | 2.08        | 0.80 |
|                      | MaxTET | 1.00 | 0.77           | 0.73                          | 17.55        | 0.12                         | 2.98        | 0.76 |
| Évora                | PM     | 0.96 | 0.88           | 0.61                          | 13.43        | -0.20                        | -4.32       | 0.86 |
|                      | HS_Rs  | 0.96 | 0.87           | 0.63                          | 13.83        | -0.15                        | -3.31       | 0.86 |
|                      | HS_S   | 1.00 | 0.80           | 0.75                          | 16.60        | 0.11                         | 2.36        | 0.79 |
|                      | HS_M   | 0.99 | 0.79           | 0.75                          | 16.58        | 0.07                         | 1.63        | 0.79 |
|                      | MaxTET | 1.01 | 0.76           | 0.84                          | 18.53        | 0.20                         | 4.50        | 0.74 |
| Ferreira do Alentejo | PM     | 0.92 | 0.89           | 0.64                          | 14.16        | -0.37                        | -8.27       | 0.83 |
|                      | HS_Rs  | 1.03 | 0.86           | 0.63                          | 14.00        | 0.16                         | 3.52        | 0.84 |
|                      | HS_S   | 1.02 | 0.80           | 0.72                          | 16.04        | 0.20                         | 4.41        | 0.79 |
|                      | HS_M   | 1.01 | 0.80           | 0.72                          | 15.91        | 0.16                         | 3.66        | 0.79 |
|                      | MaxTET | 1.00 | 0.77           | 0.78                          | 17.19        | 0.15                         | 3.28        | 0.75 |

|                          |               |      |      |      |       |       |       |      |
|--------------------------|---------------|------|------|------|-------|-------|-------|------|
| <b>Moura</b>             | <b>PM</b>     | 0.92 | 0.89 | 0.63 | 14.18 | -0.37 | -8.42 | 0.84 |
|                          | <b>HS_Rs</b>  | 1.04 | 0.85 | 0.67 | 15.09 | 0.17  | 3.96  | 0.81 |
|                          | <b>HS_S</b>   | 1.02 | 0.82 | 0.69 | 15.54 | 0.19  | 4.19  | 0.80 |
|                          | <b>HS_M</b>   | 0.99 | 0.81 | 0.67 | 15.26 | 0.05  | 1.03  | 0.81 |
|                          | <b>MaxTET</b> | 0.99 | 0.79 | 0.72 | 16.19 | 0.09  | 1.97  | 0.79 |
| <b>Odemira</b>           | <b>PM</b>     | 1.00 | 0.70 | 0.67 | 17.57 | 0.05  | 1.23  | 0.63 |
|                          | <b>HS_Rs</b>  | 1.20 | 0.70 | 1.11 | 29.14 | 0.81  | 21.20 | 0.00 |
|                          | <b>HS_S</b>   | 1.04 | 0.63 | 0.73 | 19.16 | 0.22  | 5.74  | 0.57 |
|                          | <b>HS_M</b>   | 1.00 | 0.64 | 0.67 | 17.71 | 0.10  | 2.54  | 0.63 |
|                          | <b>MaxTET</b> | 1.00 | 0.60 | 0.71 | 18.56 | 0.12  | 3.20  | 0.59 |
| <b>Redondo</b>           | <b>PM</b>     | 0.97 | 0.89 | 0.67 | 13.28 | -0.15 | -2.89 | 0.87 |
|                          | <b>HS_Rs</b>  | 0.91 | 0.86 | 0.82 | 16.11 | -0.40 | -7.81 | 0.81 |
|                          | <b>HS_S</b>   | 1.01 | 0.79 | 0.87 | 17.28 | 0.18  | 3.46  | 0.78 |
|                          | <b>HS_M</b>   | 0.99 | 0.79 | 0.86 | 16.95 | 0.09  | 1.88  | 0.79 |
|                          | <b>MaxTET</b> | 1.01 | 0.76 | 0.95 | 18.73 | 0.22  | 4.43  | 0.74 |
| <b>Serpa</b>             | <b>PM</b>     | 0.94 | 0.89 | 0.62 | 13.30 | -0.29 | -6.29 | 0.86 |
|                          | <b>HS_Rs</b>  | 1.04 | 0.88 | 0.63 | 13.58 | 0.22  | 4.70  | 0.85 |
|                          | <b>HS_S</b>   | 1.01 | 0.81 | 0.74 | 16.05 | 0.17  | 3.65  | 0.80 |
|                          | <b>HS_M</b>   | 1.01 | 0.81 | 0.74 | 16.05 | 0.17  | 3.65  | 0.80 |
|                          | <b>MaxTET</b> | 1.00 | 0.77 | 0.81 | 17.41 | 0.15  | 3.30  | 0.76 |
| <b>Viana do Alentejo</b> | <b>PM</b>     | 0.95 | 0.88 | 0.63 | 13.49 | -0.22 | -4.61 | 0.87 |
|                          | <b>HS_Rs</b>  | 0.96 | 0.84 | 0.69 | 14.72 | -0.09 | -1.97 | 0.84 |
|                          | <b>HS_S</b>   | 1.00 | 0.78 | 0.83 | 17.72 | 0.15  | 3.10  | 0.77 |
|                          | <b>HS_M</b>   | 0.98 | 0.79 | 0.80 | 16.99 | 0.07  | 1.39  | 0.79 |
|                          | <b>MaxTET</b> | 1.00 | 0.75 | 0.89 | 18.97 | 0.17  | 3.62  | 0.74 |
| <b>Vidigueira</b>        | <b>PM</b>     | 0.95 | 0.90 | 0.60 | 12.63 | -0.25 | -5.27 | 0.87 |
|                          | <b>HS_Rs</b>  | 1.03 | 0.89 | 0.60 | 12.74 | 0.20  | 4.29  | 0.87 |
|                          | <b>HS_S</b>   | 0.99 | 0.80 | 0.76 | 16.06 | 0.06  | 1.23  | 0.80 |
|                          | <b>HS_M</b>   | 0.99 | 0.80 | 0.77 | 16.24 | 0.09  | 1.94  | 0.79 |
|                          | <b>MaxTET</b> | 1.00 | 0.75 | 0.85 | 17.96 | 0.14  | 3.02  | 0.75 |
